# Supplementary material
Source: PubMed Central journal article supplement (PMC8945625)
Supplement: advancesADV2021005493C-suppl2.pdf [file advancesADV2021005493C-suppl2.pdf]

**Supplement 2: ASH COVID-19 guideline manuscript conformation to RIGHT checklist**

| <b>Domain</b>                                       | <b>RIGHT (topic)</b> | <b>ASH COVID-19 guideline manuscript (page)</b>              |
|-----------------------------------------------------|----------------------|--------------------------------------------------------------|
| <b>Basic information</b>                            |                      |                                                              |
| Title                                               | 1                    | 1                                                            |
| Authors                                             | -                    | 1-3 & Supplement 3                                           |
| Abstract                                            | -                    | 4                                                            |
| Executive summary                                   | 2                    | 5-8                                                          |
| Abbreviations and acronyms                          | 3                    | All abbreviations described within manuscript                |
| Corresponding developer                             | 4                    | 3                                                            |
| <b>Background</b>                                   |                      |                                                              |
| Brief description of the health problem             | 5                    | 9-10                                                         |
| Aims of the guideline and specific objectives       | 6                    | 9                                                            |
| Target populations                                  | 7                    | 10-11                                                        |
| End users and settings                              | 8                    | 9                                                            |
| Guideline development groups                        | 9                    | 12                                                           |
| <b>Evidence</b>                                     |                      |                                                              |
| Health care questions                               | 10                   | 13-14                                                        |
| Systematic reviews                                  | 11                   | 15-17 & Online Evidence Profiles & Supplements 1, 6-11       |
| Assessment of the certainty of the body of evidence | 12                   | 15-17, 21, 24-25 & Online Evidence Profiles                  |
| <b>Recommendations</b>                              |                      |                                                              |
| Recommendations                                     | 13                   | 19-20, 23 & Online Evidence-to-Decision frameworks           |
| Rationale for recommendations                       | 14                   | 22, 25-26 & Online Evidence-to-Decision frameworks           |
| Evidence to decision process                        | 15                   | 15-18, 20-22, 24-26 & Online Evidence-to-Decision frameworks |
| <b>Review and quality assurance</b>                 |                      |                                                              |

|                                                            |    |                                                                                                                           |
|------------------------------------------------------------|----|---------------------------------------------------------------------------------------------------------------------------|
| External review                                            | 16 | 11, 18                                                                                                                    |
| Quality assurance                                          | 17 | 11, 18                                                                                                                    |
| <b>Funding and declaration and management of interests</b> |    |                                                                                                                           |
| Funding sources and roles of the funder                    | 18 | 12-13                                                                                                                     |
| Declaration and management of interests                    | 19 | 12-13 & Supplements 4-5                                                                                                   |
| <b>Other information</b>                                   |    |                                                                                                                           |
| Access                                                     | 20 | Whole document (e.g. citation to guideline, links to Evidence-to-Decision frameworks, Evidence Profiles, and supplements) |
| Suggestions for further research                           | 21 | 29-30 & Online Evidence-to-Decision frameworks                                                                            |
| Limitations of the guideline                               | 22 | 28                                                                                                                        |
| Updating the guideline                                     | -  | 29                                                                                                                        |
| Applicability                                              | 14 | Whole document (e.g. feasibility, acceptability for each recommendation)                                                  |
| Implementation                                             | -  | Online Evidence-to-Decision frameworks                                                                                    |
| Monitoring                                                 | -  | Online Evidence-to-Decision frameworks                                                                                    |
