# Supplementary material
Source: PubMed Central journal article supplement (PMC8945625)
Supplement: advancesADV2021005493C-suppl3.pdf [file advancesADV2021005493C-suppl3.pdf]

## Supplement 3: Membership of the Guideline Panel, Methods Team, and Systematic Review Team

### Guideline Panel

- Pantep Angchaisuksiri, MD (Ramathibodi Hospital, Mahidol University, Bangkok, Thailand)
- Clifton Blair (Union, New Jersey) / Patient Representative
- Bryson, Kaitlan (Clover, South Carolina) / Patient Representative \*
- Adam Cuker, MD, MS (University of Pennsylvania) / Clinical Co-chair
- Kathryn E. Dane, PharmD (Johns Hopkins Hospital)
- Jennifer Davila, MD (Children's Hospital at Montefiore)
- Maria DeSancho, MD, MSc (Weill Cornell Medicine)
- David L. Diuguid, MD (Columbia University)
- Daniel Griffin, MD, PhD (Columbia University and ProHealth Care, New Hyde Park, NY)
- Susan R. Kahn, MD, MSc (McGill University)
- Frederikus A. Klok, MD, PhD (Leiden University Medical Center Einthoven Laboratory)
- Alfred Ian Lee, MD, PhD (Yale School of Medicine)
- Reem Mustafa, MD, PhD, MPH (University of Kansas) / Methodology Co-chair
- Ignacio Neumann, MD, PhD (Pontificia Universidad Católica de Chile, Santiago, Chile)
- Ashok Pai, MD (Kaiser Permanente, Oakland Medical Center)
- Menaka Pai, MD, MSc (McMaster University) / Ex Officio, Guideline Oversight Subcommittee
- Marc Righini, MD (University of Geneva, Switzerland)
- Kristen M. Sanfilippo, MD, MPHS (Washington University in St. Louis)
- Holger Schünemann, MD, PhD (McMaster University) / Methodology Co-chair
- Deborah Siegal, MD, MSc (Ottawa Hospital)
- Mike Skara (Cottage Grove, Minnesota) / Patient Representative
- Kamshad Touri (Ontario, Canada) / Patient Representative

- Eric K. Tseng, MD, MSc (St. Michael's Hospital, Toronto) / Writer

\* Stopped participating after June 24, 2020.

## Methods Team

- Elie A. Akl, MD, PhD, MPH (American University of Beirut)
- Romina Brignardello-Petersen, PhD, MSc, DDS (McMaster University)
- Reem Mustafa, MD, PhD, MPH (University of Kansas)
- Ignacio Neumann, MD, PhD (Pontificia Universidad Católica de Chile, Santiago, Chile)
- Robby Nieuwlaat, PhD, MSc (McMaster University)
- Holger Schünemann, MD, PhD (McMaster University)
- Karla Solo, MSc (McMaster University)
- Adrienne Stevens, MSc, PhD (McMaster University)
- Wojtek Wiercioch, PhD, MSc (McMaster University)

## Systematic Review Team

- Reyad Al Jabiri (University of Jordan)
- Yazan Al Jabiri, MD (Lincoln Medical Center)
- Elie A. Akl, MD, PhD, MPH (American University of Beirut)
- Antonio Bognanni, MD (McMaster University)
- Imad Bouakl, MD (American University of Beirut)
- Mary Ellene Boulos, BSc, MSc (McMaster University)
- Emma Cain, HBSc (McMaster University)
- Matthew Chan, MD (McMaster University)
- Rana Charide, BS, MPH (Clinical Research Institute, American University of Beirut, Beirut, Lebanon)
- Andrea J. Darzi, MD, PhD, MPH (McMaster University)
- Karin Dearness, BSc, MLS (St. Joseph's Healthcare, Hamilton, Ontario)
- Samer Karam, MD (McMaster University)
- Philipp Kolb, MBA, BHSc (McMaster University)

- Claudia (Zhe) Li, MPH, BSc, BBA (Western University)
- Luis Enrique Colunga Lozano, MD, MSc (Universidad de Guadalajara, México)
- Razan Mansour, MD (King Hussein Cancer Center, Amman, Jordan)
- Gian Paolo Morgano, PhD, MSc (McMaster University)
- Rami Z. Morsi, MD (University of Chicago)
- Giovanna Muti-Schünemann, MD (McMaster University)
- Robby Nieuwlaat, PhD, MSc (McMaster University)
- Atefeh Noori, MSc (McMaster University)
- Thomas Piggott, MD, MSc, CCFP, FRCPC (Labrador-Grenfell Health, Labrador, Canada)
- Yuan Yuan Qiu, BHSc (McMaster University)
- Yetiani Maria Roldan Benitez, MD (McMaster University)
- Holger Schünemann, MD, PhD (McMaster University)
- Finn Schünemann, MD (Albert-Ludwigs University, Freiburg, Germany)
- Karla Solo, MSc (McMaster University)
- Adrienne Stevens, MSc, PhD (McMaster University)
- Matthew Ventresca, MSc, MBA, CHE (McMaster University)
- Wojtek Wiercioch, MSc (McMaster University)
