# Supplementary material
Source: PubMed Central journal article supplement (PMC8945625)
Supplement: advancesADV2021005493C-suppl9.pdf [file advancesADV2021005493C-suppl9.pdf]

**Supplement - Baseline Risk studies – PICO 1a (Critically ill – Intermediate Intensity)**

| Study ID       | Study design         | Country, City Study Period                    | Setting  | Population                                                                                                                           | COVID-19 diagnosis                                                                                                                                           | Age                         | Male (%) | Prior VTE (%) | Anticoagulation prior to study entry (%) | D-dimer                       | Still in ICU at end of study (%) | Still in hospital at end of study (%). May include ICU, if not specified | Number of patients on prophylactic intensity (N) | Prophylactic intensity description (drug, dose, duration)                                                                                                                                                                                                                                                                                                                                                  | Risk of bias |
|----------------|----------------------|-----------------------------------------------|----------|--------------------------------------------------------------------------------------------------------------------------------------|--------------------------------------------------------------------------------------------------------------------------------------------------------------|-----------------------------|----------|---------------|------------------------------------------|-------------------------------|----------------------------------|--------------------------------------------------------------------------|--------------------------------------------------|------------------------------------------------------------------------------------------------------------------------------------------------------------------------------------------------------------------------------------------------------------------------------------------------------------------------------------------------------------------------------------------------------------|--------------|
| Ferguson 2020  | Retrospective cohort | USA, Colorado, March 15 to May 8, 2020        | ICU only | Patients with PCR confirmed SARS-CoV-2 respiratory failure necessitating invasive mechanical ventilation were included in the study. | Confirmed SARS-CoV-2 by nasal/oral PCR                                                                                                                       | Mean (SD):63.7 (3.67)       | 55.31    | NR            | NR                                       | Mean (SD):1600 (440.00)       | NR                               | NR                                                                       | 95                                               | Enoxaparin 40 mg subcutaneously daily, enoxaparin 30 mg twice daily, enoxaparin 0.5 mg/kg twice daily, or heparin 5,000 units subcutaneously two or three times daily.                                                                                                                                                                                                                                     | Low          |
| Klok 2020      | Prospective cohort   | Netherlands, NR, March 7 to April 22, 2020    | ICU only | Critically ill patients with proven COVID-19 pneumonia                                                                               | NR                                                                                                                                                           | Mean (SD):64 (12.00)        | 75.54    | NR            | NR                                       | NR                            | 75.54                            | NA                                                                       | 184                                              | Leiden University Medical Center nadroparin 2850 IU sc per day or 5700 IU per day if body weight > 100 kg, Erasmus University Medical Center Nadroparin 5700 IU per day; nadroparin 5700 IU sc twice daily from April 4th 2020 and onwards, Amphia Hospital Breda Nadroparin 2850 IU sc per day or 5700 IU per day if body weight > 100 kg; nadroparin 5700 IU sc per day from March 30th 2020 and onwards | Low          |
| Llitjos 2020   | Retrospective cohort | France, NR, March 19 to April 11, 2020        | ICU only | Critically ill patients with COVID-19 and respiratory failure                                                                        | Positive SARS-CoV-2 test by RNA detection                                                                                                                    | Median (IQR):68 (51.5,74.5) | 76.92    | 3.84          | 26.92                                    | Median (IQR):1750 (1130,2850) | 26.92                            | NR                                                                       | 8                                                | NR (not 'therapeutic intensity')                                                                                                                                                                                                                                                                                                                                                                           | Medium       |
| Lodigiani 2020 | Retrospective cohort | Italy, Milan, February 13 to April 10, 2020   | ICU only | Critically ill patients requiring intensive care                                                                                     | Symptomatic with laboratory-proven COVID-19                                                                                                                  | Median (IQR):61 (55,69)     | 80.33    | 0.00          | 3.30                                     | NR                            | NR                               | NR                                                                       | 48                                               | NR, as labeled by authors                                                                                                                                                                                                                                                                                                                                                                                  | Medium       |
| Longchamp 2020 | Other                | Switzerland, Sion, March 8 and April 4, 2020  | ICU only | Critically ill patients admitted to ICU for hypoxemic respiratory failure                                                            | Positive result on a reverse transcriptase–polymerase chain reaction assay of a specimen collected from a nasopharyngeal swab, sputum, or bronchial aspirate | Mean (SD):68 (11.00)        | 64       | 0.00          | 8.00                                     | Median (IQR):2071 (953,3606)  | 8.00                             | NR                                                                       | 25                                               | Heparin, 5000 IU SC TID) or (Enoxaparin, 4000 IU SC OD                                                                                                                                                                                                                                                                                                                                                     | Low          |
| Maatman 2020   | Retrospective cohort | USA, Indianapolis, March 12 to March 31, 2020 | ICU only | Patients with laboratory-confirmed SARS-CoV-2 infection. Admitted to three Indianapolis area hospitals                               | Confirmed Dx, Positive SARS-CoV-2 test only                                                                                                                  | Mean (SD):61 (16.00)        | 56.88    | NR            | NR                                       | Median (IQR):84506 (321,973)  | 2.75                             | 3.66                                                                     | 109                                              | 5,000 U subcutaneous heparin every 8 hours, 40 mg enoxaparin daily, or                                                                                                                                                                                                                                                                                                                                     | Low          |

|               |                      |                                                      |          |                                                                                                                                                                                                                                                                  |                                                                                                                                                                                                                                                          |                         |       |    |    |  |                              |    |    |                       |                                                                                                                                                                                                                     |                                          |
|---------------|----------------------|------------------------------------------------------|----------|------------------------------------------------------------------------------------------------------------------------------------------------------------------------------------------------------------------------------------------------------------------|----------------------------------------------------------------------------------------------------------------------------------------------------------------------------------------------------------------------------------------------------------|-------------------------|-------|----|----|--|------------------------------|----|----|-----------------------|---------------------------------------------------------------------------------------------------------------------------------------------------------------------------------------------------------------------|------------------------------------------|
|               |                      |                                                      |          |                                                                                                                                                                                                                                                                  |                                                                                                                                                                                                                                                          |                         |       |    |    |  |                              |    |    | 30 mg enoxaparin bid. |                                                                                                                                                                                                                     |                                          |
| Mei 2020      | Retrospective cohort | China, Hubei, January 1 to March 23, 2020            | ICU only | Critically ill patients requiring ventilator support                                                                                                                                                                                                             | Symptomatic with laboratory-proven COVID-20                                                                                                                                                                                                              | NR                      |       | NR | NR |  | NR                           | NR | NR | 45                    | NR, as labeled by authors                                                                                                                                                                                           | Low                                      |
| Nougier 2020  | Retrospective cohort | France, Lyon, NR                                     | ICU only | Adult patients with a positive COVID-19 PCR                                                                                                                                                                                                                      | PCR                                                                                                                                                                                                                                                      | Mean (SD):62.8 (13.10)  | NR    | NR | NR |  | Mean (SD):3456 (2641.00)     | NR | NR | 48                    | Enoxaparin, 40 mg once daily if 50-100 kg and 40 mg twice daily [BID] if >100 kg or fibrinogen >8 g/L or D-dimer >3000 ng/mL or subcutaneous unfractionated heparin, (5000 IU BID) according to their renal status. | Medium                                   |
| Pavoni 2020   | Retrospective cohort | Italy, Bagno a Ripoli, February 28 to April 10, 2020 | ICU only | Adult patients (≥ 18 years old) with severe COVID-19 admitted to ICU                                                                                                                                                                                             | Diagnosis of severe COVID-19 pneumonia was according to World Health Organization (WHO) [12] interim guidance and it was confirmed by RNA detection of the SARS-CoV-2 in clinical laboratory of Santa Maria Annunziata Hospital (Bagno a Ripoli, Italy). | Mean (SD):61 (13.00)    | 60    | NR | NR |  | Mean (SD):1556 (1090.00)     | NR | NR | 40                    | Enoxaparin 30 mg (3000 units) SC BID (for BMI >40 kg/m <sup>2</sup> ); Enoxaparin 40 mg (4000 units) SC OD                                                                                                          | Mortality: Low<br>Other outcomes: Medium |
| Trigonis 2020 | Retrospective cohort | USA, Indianapolis, March 23 to April 8, 2020         | ICU only | Patients hospitalized at international units Health Methodist Hospital with severe acute respiratory syndrome coronavirus 2 requiring intubation between March 23, 2020, and April 8, 2020, (...) all who underwent ultrasound evaluation for DVT were included. | Patients with confirmed SARS-CoV-2                                                                                                                                                                                                                       | Mean (SD):60.8 (14.90)  |       | NR | NR |  | NR                           | NR | NR | 33                    | LMWH 30 mg, 40 mg, UFH 5000 U                                                                                                                                                                                       | Low                                      |
| Wright 2020   | Prospective cohort   | USA, Colorado, March 1 to April 20, 2020             | ICU only | Critically ill patients with covid-19                                                                                                                                                                                                                            | Patients with documented COVID-19                                                                                                                                                                                                                        | Median (IQR):54 (42,59) | 63.63 | NR | NR |  | Median (IQR):1840 (935,4085) | NR | NR | 44                    | Enoxaparin, between 40 and 60 mg/d or UFH between 10,000 and 15,000 units/d.                                                                                                                                        | Medium                                   |

**Supplement – Anticoagulation Intensity studies – PICO 1a (Critically ill – Intermediate Intensity)**

| Study ID         | Study design       | Country, City Study Period                                | Population                                                                                                                                                                                                                                                                                                                                                                                                                              | COVID-19 diagnosis                                                                              | Age                      | Male (%) | Prior VTE (%) | Anticoagulation prior to study entry (%) | D-dimer              | Still in ICU at end of study (%) | Still in hospital at end of study (%) May include ICU, if not specified | Anticoagulation Group (N)      | Anticoagulation intensity description (drug, dose, duration)                                                               | Risk of bias |
|------------------|--------------------|-----------------------------------------------------------|-----------------------------------------------------------------------------------------------------------------------------------------------------------------------------------------------------------------------------------------------------------------------------------------------------------------------------------------------------------------------------------------------------------------------------------------|-------------------------------------------------------------------------------------------------|--------------------------|----------|---------------|------------------------------------------|----------------------|----------------------------------|-------------------------------------------------------------------------|--------------------------------|----------------------------------------------------------------------------------------------------------------------------|--------------|
| INSPIRATION 2021 | Parallel RCT group | Iran, multiple cities, July 29, 2020 to November 19, 2020 | "Patients admitted to the ICU with polymerase chain reaction testing–confirmed COVID-19 within 7 days of the index hospitalization were eligible for inclusion. Patients with life expectancy less than 24 hours, an established indication for therapeutic-dose anticoagulation, weight less than 40 kg, pregnancy, history of heparin-induced thrombocytopenia, platelet count less than 50 ×103/μL, or overt bleeding were excluded. | Polymerase chain reaction testing–confirmed COVID-19 within 7 days of the index hospitalization | Median (IQR): 62 (50,71) | 57.80    | 0%            | 0%                                       | Mean (SD): 972 (394) | 39%                              | NR                                                                      | Prophylactic intensity (N=286) | Enoxaparin, 40mg daily                                                                                                     | Probably Low |
|                  |                    |                                                           |                                                                                                                                                                                                                                                                                                                                                                                                                                         |                                                                                                 |                          |          |               |                                          |                      |                                  |                                                                         | Intermediate intensity (N=276) | For patients who weighed less than 120 kg and had a creatinine clearance greater than 30 mL/min, enoxaparin, 1 mg/kg daily |              |
